# Supplementary material for: Phytochemical production and antioxidant activity improvement of Rhinacanthus nasutus (L.) Kurz calli by in vitro polyploidization
Source: PeerJ. 2025 Apr 11;13:e19160. doi: 10.7717/peerj.19160 (PMC11995891; doi:10.7717/peerj.19160)
Supplement: Supplemental Information 1 [file peerj-13-19160-s001.xlsx]

## Sheet: Survival
Colchicine conc. (%)	Exposure times (h)	Survival (%)
0	24	100
0	24	100
0	24	100
0	24	100
0	24	100
0	24	100
0	24	100
0	24	100
0	24	100
0	24	100
0	24	100
0	24	100
0	48	100
0	48	100
0	48	100
0	48	100
0	48	100
0	48	100
0	48	100
0	48	100
0	48	100
0	48	100
0	48	100
0	48	100
0.05	24	100
0.05	24	100
0.05	24	100
0.05	24	100
0.05	24	100
0.05	24	100
0.05	24	100
0.05	24	100
0.05	24	100
0.05	24	0
0.05	24	0
0.05	24	0
0.05	48	100
0.05	48	100
0.05	48	100
0.05	48	100
0.05	48	100
0.05	48	100
0.05	48	100
0.05	48	100
0.05	48	100
0.05	48	0
0.05	48	0
0.05	48	0
1	24	100
1	24	100
1	24	100
1	24	100
1	24	100
1	24	100
1	24	100
1	24	100
1	24	100
1	24	0
1	24	0
1	24	0
1	48	100
1	48	100
1	48	100
1	48	100
1	48	100
1	48	100
1	48	100
1	48	0
1	48	0
1	48	0
1	48	0
1	48	0
2	24	100
2	24	100
2	24	100
2	24	100
2	24	100
2	24	0
2	24	0
2	24	0
2	24	0
2	24	0
2	24	0
2	24	0
2	48	100
2	48	100
2	48	100
2	48	100
2	48	100
2	48	0
2	48	0
2	48	0
2	48	0
2	48	0
2	48	0
2	48	0

## Sheet: Weight
Colchicine conc. (%)	Exposure times (h)	Fresh weight (g)	Dry weight (g)
0	24	3.306	0.1424
0	24	3.4732	0.149
0	24	3.5546	0.1711
0	24	2.4678	0.124
0	24	2.4144	0.1471
0	48	3.2764	0.1072
0	48	4.4054	0.1537
0	48	3.3412	0.1045
0	48	4.3135	0.1431
0	48	2.6848	0.1311
0.05	24	4.5296	0.1328
0.05	24	2.9174	0.1468
0.05	24	3.1266	0.1237
0.05	24	2.7859	0.1593
0.05	24	3.8682	0.1278
0.05	48	3.2658	0.0909
0.05	48	3.3223	0.1735
0.05	48	2.3457	0.1125
0.05	48	2.5423	0.07
0.05	48	2.1235	0.0882
1	24	3.306	0.1441
1	24	3.1254	0.1325
1	24	3.2163	0.1564
1	24	2.2521	0.1125
1	24	3.1427	0.1456
1	48	2.8995	0.1095
1	48	3.1984	0.1268
1	48	2.7276	0.0838
1	48	3.3385	0.1359
1	48	4.1478	0.1067
2	24	3.6756	0.1856
2	24	3.9552	0.1465
2	24	3.523	0.1758
2	24	3.3557	0.1099
2	24	3.9348	0.145
2	48	3.0636	0.1525
2	48	3.6241	0.1648
2	48	3.7044	0.1309
2	48	4.2044	0.1187
2	48	3.9064	0.1369

## Sheet: % Ploidy
Colchicine conc. (%)	Exposure times (h)	Polyploidy induction by ploidy level (%)
		Diploid (%)	Tetraploid (%)	Mixoploid (%)
0	24	100	0	0
0	24	100	0	0
0	24	100	0	0
0	48	100	0	0
0	48	100	0	0
0	48	100	0	0
0.05	24	100	0	0
0.05	24	100	0	0
0.05	24	100	0	0
0.05	48	33.33	0	0
0.05	48	66.67	100	0
0.05	48	0	100	0
1	24	100	0	0
1	24	100	33.33	0
1	24	0	66.67	0
1	48	100	0	0
1	48	100	33.33	0
1	48	0	66.67	0
2	24	33.33	0	100
2	24	66.67	0	100
2	24	0	0	0
2	48	100	0	0
2	48	100	0	0
2	48	100	0	0

## Sheet: Yield
Ploidy levels	Extract yield (%)
Diploid	9.93
Diploid	10.32
Diploid	13.6
Tetraploid	28.48
Tetraploid	24.97
Tetraploid	29.23
Mixoploid	12.1
Mixoploid	18.02
Mixoploid	12.29

## Sheet: TPC, TFC, FRAP
Ploidy levels	TPC (mg GAE/g extract)	TFC (mg QE/g extract)	FRAP assay (mg TE/g extract)
Diploid	35.6163	19	13.8293
Diploid	35.5	19	13.0976
Diploid	35.3837	19	13.4634
Diploid	35.8488	20.6667	12.5488
Diploid	35.3837	19	11.2073
Diploid	35.7326	17.3333	12.4268
Diploid	35.6163	17.3333	12.5488
Diploid	35.6163	19	12.2439
Diploid	35.2674	19	12.6707
Diploid	35.9651	17.3333	12.4878
Tetraploid	80.9651	39	39.6829
Tetraploid	80.6163	32.3333	39.9268
Tetraploid	80.2674	34	40.0488
Tetraploid	81.0814	35.6667	39.622
Tetraploid	80.6163	37.3333	39.9878
Tetraploid	82.1279	32.3333	39.9268
Tetraploid	82.0116	35.6667	39.8659
Tetraploid	81.6628	34	40.2927
Tetraploid	81.314	35.6667	40.0488
Tetraploid	82.1279	37.3333	39.622
Mixoploid	70.3837	14	28.0976
Mixoploid	70.2674	15.6667	28.1585
Mixoploid	70.7326	20.6667	27.4878
Mixoploid	70.8488	15.6667	28.4634
Mixoploid	70.7326	19	28.3415
Mixoploid	70.5	25.6667	29.3171
Mixoploid	71.4302	20.6667	29.439
Mixoploid	71.0814	20.6667	29.6829
Mixoploid	70.8488	17.3333	29.8049
Mixoploid	71.314	19	29.2561

## Sheet: DPPH, ABTS
Sample	DPPH IC50 by DPPH assay (μg/mL)	ABTS IC50 by ABTS assay (μg/mL)
Diploid	267.261	526.208
Diploid	267.336	528.157
Diploid	267.494	523.572
Diploid	267.786	520.722
Diploid	270.929	522.752
Tetraploid	89.2283	178.422
Tetraploid	89.6253	179.285
Tetraploid	89.7094	179.419
Tetraploid	88.5722	178.537
Tetraploid	89.3963	180.164
Mixoploid	108.391	282.31
Mixoploid	106.407	281.139
Mixoploid	106.571	279.499
Mixoploid	106.829	280.986
Mixoploid	105.896	275.922
Ascorbic acid	5.41913	3.19101
Ascorbic acid	5.37694	3.17169
Ascorbic acid	5.4016	3.18901
Ascorbic acid	5.40099	3.17163
Ascorbic acid	5.38176	3.17596
